# Supplementary material for: Improved genome sequencing using an engineered transposase
Source: PubMed Central journal article supplement (PMC5240201; doi:10.1186/s12896-016-0326-1), 2017-01-17

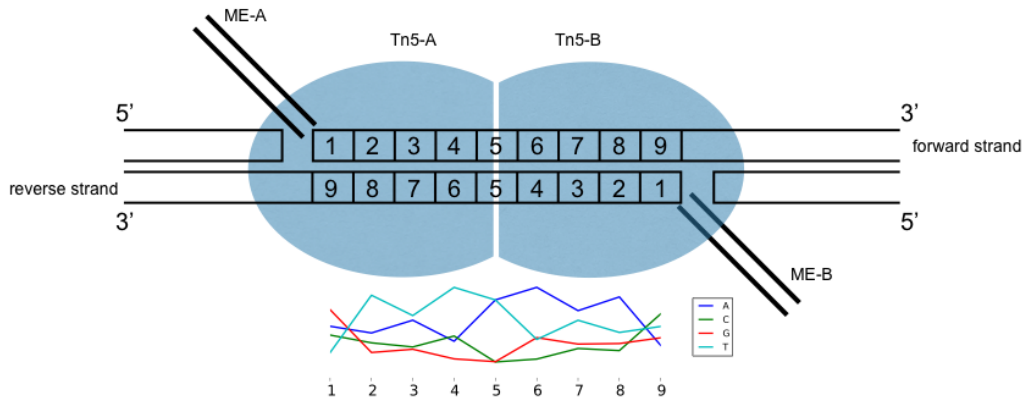

Supplement: 12896_2016_326_MOESM4_ESM.pdf [file 12896_2016_326_MOESM4_ESM.pdf]
