# Supplementary material for: Improved genome sequencing using an engineered transposase
Source: PubMed Central journal article supplement (PMC5240201; doi:10.1186/s12896-016-0326-1), 2017-01-17
Supplement: 12896_2016_326_MOESM7_ESM.pdf [file 12896_2016_326_MOESM7_ESM.pdf]

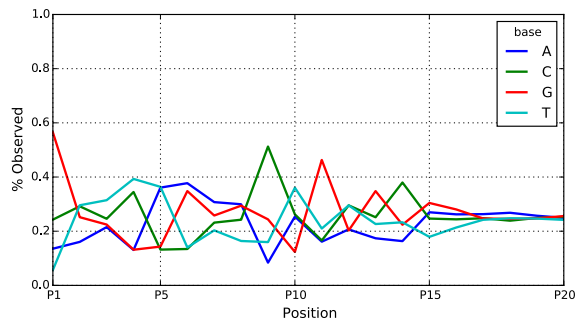

(a)

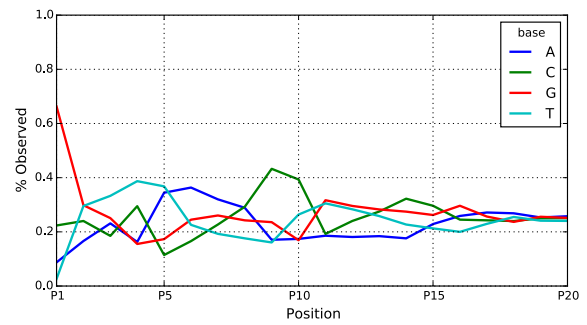

(b)

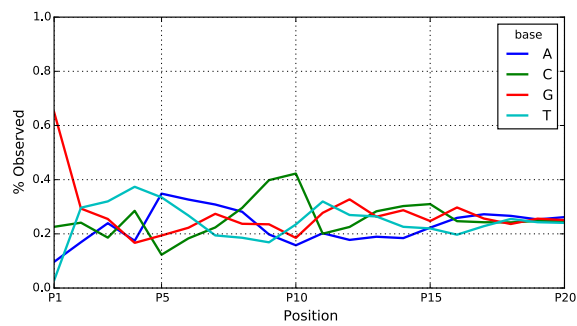

(c)

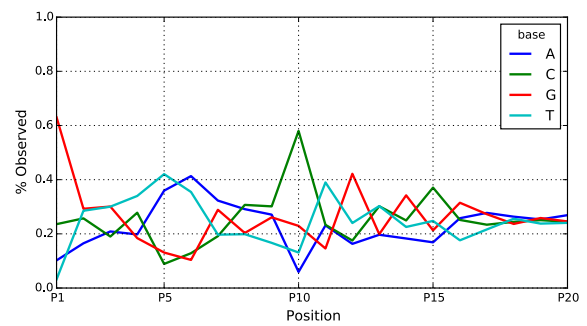

(d)

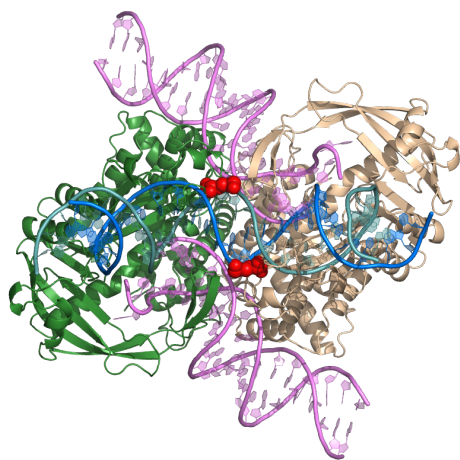

(e)

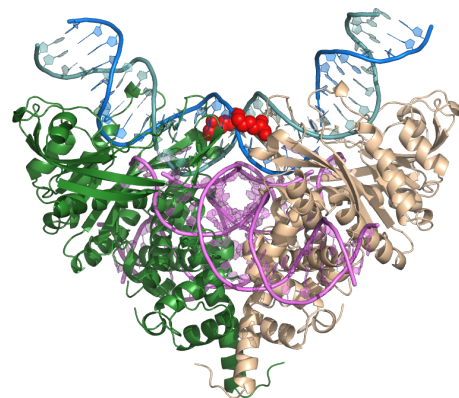

(f)
